# Supplementary material for: Combining DNA and HPTLC profiles to differentiate a pain relief herb, Mallotus repandus, from plants sharing the same common name, “Kho-Khlan”
Source: PLOS journal article supplement (doi:10.1371/journal.pone.0268680), 2022-06-09

**S1 Fig. Confirmation of CD3 (*M. repandus*) by sequencing of PCR amplicons after Bar-HRM analysis.** (A) DNA alignment of the CD3 sequence with sequences of authentic *A. coeculus*, *C. caudatus* and *M. repandus*, (B) electropherogram showing partial sequence obtained from Bar-HRM amplicon. Red box presents identical nucleotide sequences among the authentic *M. repandus* sequence and CD3 sequence. Green box shows the same area between nucleotide alignment and electropherogram. “•” indicates identical nucleotide sequence. “-” presents no electropherogram result.

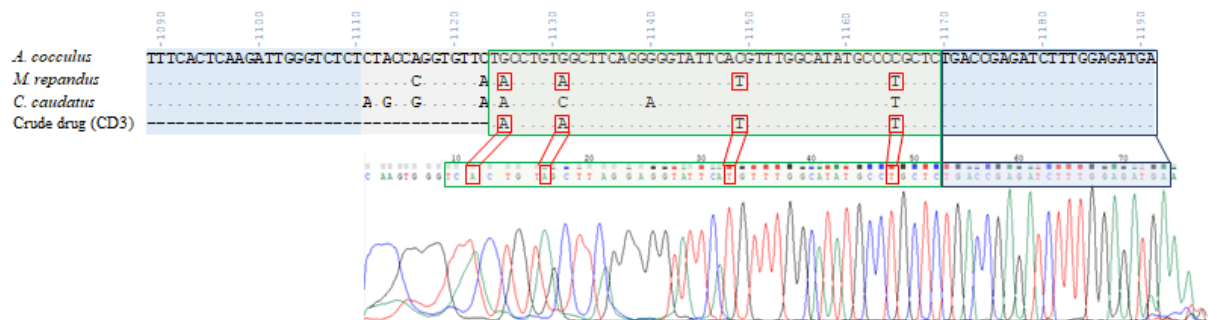

Supplement: S1 (10.1371/journal.pone.0268680.s001) [file journal.pone.0268680.s001]
